# Supplementary material for: The integrated effect of salinity, organic amendments, phosphorus fertilizers, and deficit irrigation on soil properties, phosphorus fractionation and wheat productivity
Source: PubMed Central journal article supplement (PMC7026061; doi:10.1038/s41598-020-59650-8), 2020-02-17
Supplement: 41598_2020_59650_MOESM1_ESM.pdf [file 41598_2020_59650_MOESM1_ESM.pdf]

# **The integrated effect of salinity, organic amendments, phosphorus fertilizers, and deficit irrigation on soil properties, phosphorus fractionation and wheat productivity**

Zheli Ding<sup>1</sup>, Ahmed M.S. Kheir<sup>1,2\*</sup>, Marwa G.M. Ali<sup>2</sup>, Osama A.M. Ali<sup>3</sup>, Aly I.N. Abdelaal<sup>2</sup>, Xin'e Lin<sup>1</sup>, Zhaoxi Zhou<sup>1</sup>, Bizun Wang<sup>1</sup>, Beibei Liu<sup>4</sup>, Zhenli He<sup>5</sup>

<sup>1</sup>Haikou Experimental Station, Chinese Academy of Tropical Agricultural Sciences (CATAS), Haikou, China

<sup>2</sup>Soils, Water and Environment Research Institute, Agricultural Research Center, Giza, Egypt

<sup>3</sup>Crop Science Dept., Faculty of Agriculture, Menoufia University, Shebin El-Kom, Egypt

<sup>4</sup>Institute of Environmental and Plant Protection/Environmental Impact Assessment and Risk Analysis Center, Chinese Academy of Tropical Agricultural Sciences, Haikou, Hainan, China

<sup>5</sup>University of Florida, Institute of Food and Agricultural Sciences, Indian River Research and Education Center, Fort Pierce, FL 34945, USA

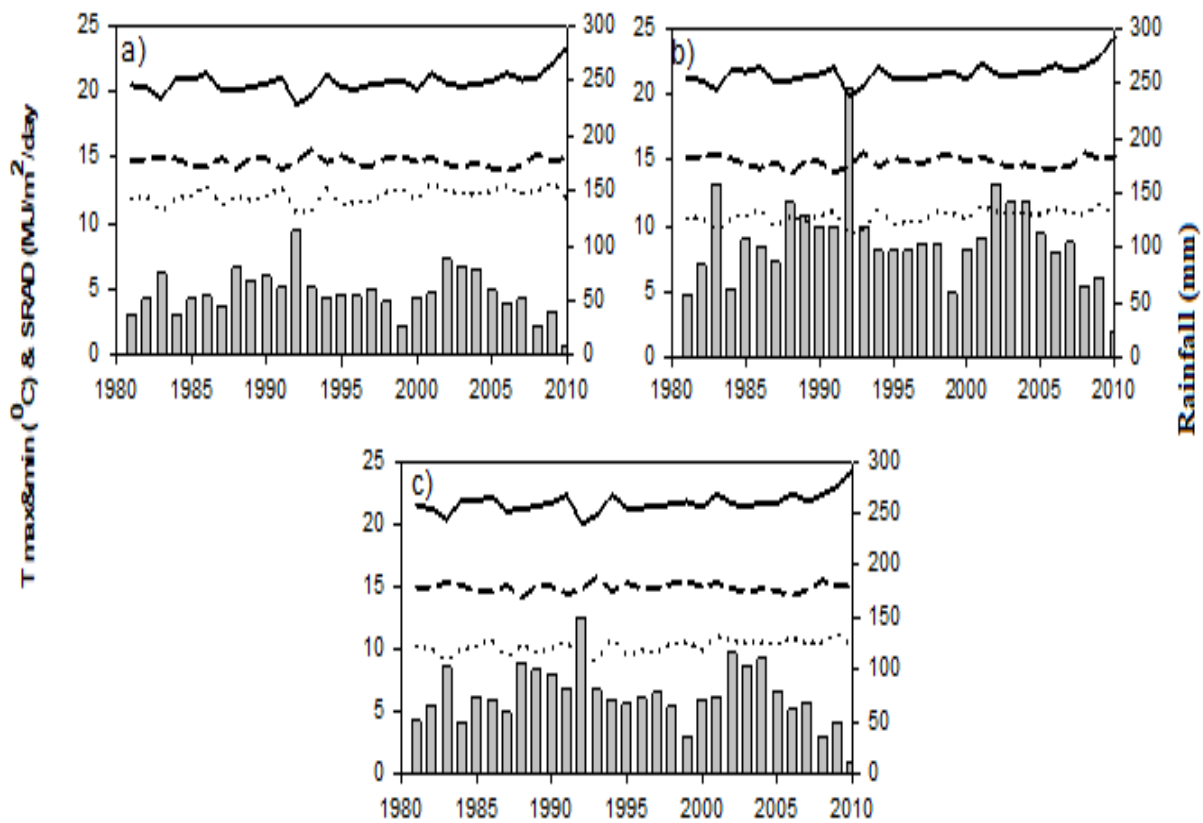

Supplementary Figure. S1 Weather data represented as lines (maximum temperature), dashed lines (solar radiation), dotted lines (minimum temperature) and bars (rainfall) of wheat during the growing season (planting-harvest) for 30 years (1981-2010) in the three studied locations. The locations are a, b, and c, for Kafrelsheikh, El-Riad, and Hamoul, respectively represent the first agroclimatic zone in Egypt.

| Treatments | Non-saline soil | Saline soil | Highly saline soil |
|------------|-----------------|-------------|--------------------|
| Control    | 7.78abc         | 8.00abc     | 8.18a              |
| Ps         | 7.79abc         | 8.12abc     | 8.19a              |
| Pa         | 7.77abc         | 8.10abc     | 8.16ab             |
| SS         | 7.52c           | 7.78c       | 8.00abc            |
| Ps+SS      | 7.58abc         | 7.95abc     | 8.14ab             |
| Pa+SS      | 7.55bc          | 7.80bc      | 8.10abc            |
| FYM        | 7.60bc          | 7.85bc      | 8.12abc            |
| Ps+FYM     | 7.70abc         | 7.99abc     | 8.18a              |
| Pa+FYM     | 7.66abc         | 7.99abc     | 8.17ab             |

Supplementary Table S1 Soil pH subjected to organic amendments and P fertilizers in different soil types. Note: FYM, farmyard manure, SS: sewage sludge, Ps: single superphosphate, Pa: di-ammonium phosphate. Values accompanied by different letters within the same column are significantly different at the  $P < 0.05$  level of significance.

| Irrigation<br>(I) | Characters<br>Salinity (S <sub>a</sub> )<br>Amendments<br>(A) | Spikes number m <sup>-2</sup> |        |        |        | Number of grains spike <sup>-1</sup> |       |       |       | 1000-grain weight (g) |       |       |       |
|-------------------|---------------------------------------------------------------|-------------------------------|--------|--------|--------|--------------------------------------|-------|-------|-------|-----------------------|-------|-------|-------|
|                   |                                                               | N-S                           | S      | HS     | Mean   | N-S                                  | S     | HS    | Mean  | N-S                   | S     | HS    | Mean  |
| FI                | Control                                                       | 338.00                        | 317.67 | 290.50 | 315.39 | 53.83                                | 45.50 | 40.00 | 46.44 | 42.85                 | 40.77 | 39.25 | 40.96 |
|                   | P <sub>s</sub>                                                | 352.34                        | 335.67 | 328.50 | 338.84 | 60.00                                | 50.67 | 45.67 | 52.11 | 43.79                 | 42.12 | 40.10 | 42.00 |
|                   | P <sub>a</sub>                                                | 349.50                        | 334.17 | 327.34 | 337.00 | 58.67                                | 52.33 | 45.17 | 52.06 | 43.51                 | 41.97 | 39.99 | 41.82 |
|                   | SS                                                            | 346.33                        | 330.67 | 328.34 | 335.11 | 59.84                                | 51.84 | 44.83 | 52.17 | 43.68                 | 41.62 | 39.74 | 41.68 |
|                   | P <sub>s</sub> +SS                                            | 388.00                        | 368.34 | 348.50 | 368.28 | 61.00                                | 54.50 | 47.67 | 54.39 | 47.85                 | 45.39 | 42.25 | 45.16 |
|                   | P <sub>a</sub> +SS                                            | 385.17                        | 356.00 | 348.33 | 363.17 | 60.17                                | 52.00 | 48.00 | 53.39 | 47.07                 | 44.15 | 41.93 | 44.38 |
|                   | FYM                                                           | 345.50                        | 331.67 | 325.67 | 334.28 | 57.33                                | 49.67 | 44.83 | 50.61 | 43.10                 | 41.40 | 39.62 | 41.37 |
|                   | P <sub>s</sub> +FYM                                           | 393.50                        | 370.50 | 355.17 | 373.06 | 67.84                                | 61.83 | 53.84 | 61.17 | 47.97                 | 45.05 | 42.48 | 45.17 |
|                   | P <sub>a</sub> +FYM                                           | 389.67                        | 366.67 | 351.67 | 369.34 | 60.17                                | 56.17 | 50.34 | 55.56 | 47.30                 | 44.67 | 41.67 | 44.55 |
| DI                | Control                                                       | 323.33                        | 297.17 | 270.17 | 296.89 | 48.34                                | 41.50 | 36.33 | 42.06 | 42.55                 | 40.42 | 38.82 | 40.60 |
|                   | P <sub>s</sub>                                                | 333.67                        | 312.17 | 297.34 | 314.39 | 50.50                                | 44.34 | 40.67 | 45.17 | 43.17                 | 40.97 | 39.29 | 41.14 |
|                   | P <sub>a</sub>                                                | 330.00                        | 304.34 | 286.34 | 306.89 | 49.84                                | 45.33 | 39.67 | 44.95 | 42.80                 | 40.99 | 39.24 | 41.01 |
|                   | SS                                                            | 326.83                        | 303.67 | 291.67 | 307.39 | 48.50                                | 44.67 | 39.50 | 44.22 | 42.48                 | 40.92 | 38.72 | 40.71 |
|                   | P <sub>s</sub> +SS                                            | 346.84                        | 331.17 | 313.50 | 330.50 | 53.17                                | 50.17 | 47.17 | 50.17 | 44.49                 | 43.67 | 41.40 | 43.19 |
|                   | P <sub>a</sub> +SS                                            | 349.84                        | 322.34 | 297.34 | 323.17 | 51.33                                | 47.00 | 41.17 | 46.50 | 44.79                 | 42.79 | 39.38 | 42.32 |
|                   | FYM                                                           | 325.34                        | 304.84 | 291.84 | 307.34 | 51.50                                | 44.67 | 40.83 | 45.67 | 42.34                 | 41.04 | 39.25 | 40.88 |
|                   | P <sub>s</sub> +FYM                                           | 360.83                        | 324.50 | 308.50 | 331.28 | 55.17                                | 50.00 | 43.50 | 49.56 | 45.43                 | 42.35 | 40.36 | 42.71 |
|                   | P <sub>a</sub> +FYM                                           | 351.34                        | 314.50 | 303.50 | 323.11 | 50.17                                | 45.17 | 42.67 | 46.00 | 45.14                 | 41.45 | 39.39 | 41.99 |
|                   | Mean                                                          | 352.00                        | 329.23 | 314.68 |        | 55.41                                | 49.30 | 43.99 |       | 44.46                 | 42.32 | 40.16 |       |
| LSD<br>≤0.05      | S <sub>a</sub>                                                |                               |        | 11.51  |        |                                      |       | 3.57  |       |                       |       | 1.92  |       |
|                   | I                                                             |                               |        | 10.64  |        |                                      |       | 4.08  |       |                       |       | 1.15  |       |
|                   | A                                                             |                               |        | 15.57  |        |                                      |       | 4.95  |       |                       |       | NS    |       |
|                   | S <sub>a</sub> × I                                            |                               |        | 22.45  |        |                                      |       | 8.61  |       |                       |       | 2.43  |       |
|                   | S <sub>a</sub> × A                                            |                               |        | 24.55  |        |                                      |       | 7.80  |       |                       |       | 5.16  |       |
|                   | I × A                                                         |                               |        | 22.02  |        |                                      |       | 7.00  |       |                       |       | 4.62  |       |
|                   | S <sub>a</sub> × I × A                                        |                               |        | 34.71  |        |                                      |       | 11.04 |       |                       |       | 7.29  |       |

Supplementary Table S2. Wheat spikes number, grains number per spike and grain weight as affected by irrigation regimes, phosphorus fertilizers and organic amendments applied to three soils with different salinity levels. Note, FI and DI: full and deficit irrigation respectively, N-S: non-saline soil, S: saline soil, HS: high saline soil, Ps: superphosphate fertilizer, Pa: ammonium phosphate, SS: sewage sludge, FYM: farmyard manure, S<sub>a</sub>: salinity factor, I: irrigation, A: amendments. Data represent the average of the two growing seasons.

| Item                      | FYM      | SS        | Ps       | Pa       |
|---------------------------|----------|-----------|----------|----------|
| EC (dS m <sup>-1</sup> )  | 2.3±0.05 | 2.8±0.04  | n.d      | n.d      |
| SAR                       | 5.00±0.1 | 20.0±0.2  | n.d      | n.d      |
| pH                        | 7.6±0.01 | 6.3±0.01  | 8.0±0.02 | 7.8±0.02 |
| OM (%)                    | 45±0.2   | 65±0.3    | n.d      | n.d      |
| TN (mg kg <sup>-1</sup> ) | 3.7±0.1  | 4.1±0.2   | 1.2±0.01 | 1.8±0.01 |
| TP (mg kg <sup>-1</sup> ) | 11±0.2   | 13±0.3    | 15.5     | 46.0     |
| TK (mg kg <sup>-1</sup> ) | 40±0.5   | 50±0.6    | n.d      | n.d      |
| Cd (mg kg <sup>-1</sup> ) | 4±1.0    | 75±5.0    | 4±0.01   | 1.8±0.02 |
| Ni (mg kg <sup>-1</sup> ) | 14±3.0   | 138.7±5.5 | 1.2±1.0  | 0.8±0.5  |
| Pb (mg kg <sup>-1</sup> ) | 60±4.1   | 671±15.0  | 3.5±2.5  | 1.8±0.7  |

Supplementary Table S3 Chemical characteristics and heavy metals content of soil organic amendments and phosphate fertilizers. Note: FYM, farmyard manure, SS: sewage sludge, Ps: single superphosphate, Pa: di-ammonium phosphate, EC: electrical conductivity, OM: organic matter content, TN: total nitrogen, TP: total phosphorus, TK: total potassium, n.d: non-detected, Means ± Stdev, n=3.

| Item                             | Unit                  | Non-saline soil | Saline soil | Highly saline soil |
|----------------------------------|-----------------------|-----------------|-------------|--------------------|
| EC (soil paste extract)          | dS m <sup>-1</sup>    | 3.1             | 6.5         | 15.0               |
| pH (1:2.5 soil water suspension) |                       | 7.8             | 8.1         | 8.2                |
| SAR                              |                       | 8.0             | 11.0        | 14.0               |
| CEC                              | Cmol kg <sup>-1</sup> | 38.0            | 40.0        | 32.0               |
| OM                               | %                     | 1.45            | 1.50        | 1.32               |
| Available N                      | mg kg <sup>-1</sup>   | 55.0            | 50.0        | 38.0               |
| Available P                      | mg kg <sup>-1</sup>   | 6.5             | 6.0         | 5.2                |
| Available K                      | mg kg <sup>-1</sup>   | 220             | 200         | 185                |
| Total P                          | mg kg <sup>-1</sup>   | 787.3           | 785.0       | 695.2              |
| Silt                             | %                     | 29.7            | 25.5        | 20.5               |
| Clay                             | %                     | 51.9            | 52.3        | 57.6               |
| Sand                             | %                     | 18.4            | 22.2        | 21.9               |
| Texture                          |                       | Clay            | Clay        | Clay               |
| Bulk density                     | Mg m <sup>-3</sup>    | 1.20            | 1.28        | 1.35               |
| Hydraulic conductivity           | cm day <sup>-1</sup>  | 2.5             | 2.2         | 2.0                |
| Field capacity                   | %                     | 41.0            | 40.0        | 38.5               |
| Wilting point                    | %                     | 21.0            | 20.2        | 19.5               |
| Available water                  | %                     | 20.0            | 19.8        | 19.0               |
| Total Cd                         | mg kg <sup>-1</sup>   | 2.5             | 3.1         | 3.0                |
| Total Ni                         | mg kg <sup>-1</sup>   | 35              | 42          | 40                 |
| Total Pb                         | mg kg <sup>-1</sup>   | 280             | 300         | 270                |

Supplementary Table S4 Initial physical and chemical properties of non-saline, saline and highly saline soils in the three studied locations prior to treatments. Note: Data of each item is the average of three soil depths, EC: electrical conductivity, SAR: sodium adsorption ratio, CEC: cation exchange capacity

| Soil types                    |           | N-S      |           |          |           | S        |          |          |         | HS       |          |          |  |
|-------------------------------|-----------|----------|-----------|----------|-----------|----------|----------|----------|---------|----------|----------|----------|--|
| Growing seasons               |           | Season 1 |           | Season 2 |           | Season 1 |          | Season 2 |         | Season 1 |          | Season 2 |  |
|                               | Date      | Quota    | Date      | Quota    | Date      | Quota    | Date     | Quota    | Date    | Quota    | Date     | Quota    |  |
| Deficit irrigation            | Nov, 15   | 90       | Nov, 15   | 88       | Nov, 15   | 95       | Nov, 15  | 98       | Nov, 15 | 102      | Nov, 15  | 105      |  |
|                               | Dec, 5    | 55       | Dec, 8    | 65       | Dec, 1    | 60       | Dec, 3   | 65       | Dec, 1  | 75       | Dec, 2   | 70       |  |
|                               | Jan, 15   | 80       | Jan, 10   | 75       | Jan, 5    | 70       | Jan, 11  | 72       | Dec, 31 | 83       | Jan, 2   | 90       |  |
|                               | March, 10 | 55       | March, 8  | 92       | March, 1  | 75       | Feb, 27  | 85       | Feb, 28 | 80       | Feb, 25  | 95       |  |
| Irrigation water applied (mm) |           | 280      |           | 320      |           | 300      |          | 320      |         | 340      |          | 360      |  |
| Rainfall (mm)                 |           | 150.4    |           | 72.5     |           | 123.6    |          | 71.9     |         | 115.6    |          | 73.4     |  |
| Total water applied (mm)      |           | 430.4    |           | 392.5    |           | 423.6    |          | 391.9    |         | 455.6    |          | 433.4    |  |
| Full irrigation               | Nov, 15   | 90       | Nov, 15   | 88       | Nov, 15   | 95       | Nov, 15  | 98       | Nov, 15 | 102      | Nov, 15  | 105      |  |
|                               | Dec, 1    | 40       | Dec, 3    | 50       | Nov, 28   | 53       | Nov, 29  | 55       | Nov, 25 | 65       | Nov, 27  | 62       |  |
|                               | Dec, 30   | 65       | Jan, 1    | 70       | Dec, 25   | 55       | Dec, 20  | 62       | Dec, 15 | 72       | Dec, 18  | 82       |  |
|                               | Jan, 25   | 45       | Feb, 2    | 55       | Jan, 18   | 62       | Jan, 20  | 80       | Jan, 18 | 75       | Jan, 15  | 88       |  |
|                               | March, 15 | 60       | March, 13 | 77       | March, 10 | 55       | March, 5 | 85       | Feb, 28 | 56       | March, 1 | 53       |  |
| Irrigation water applied (mm) |           | 300      |           | 340      |           | 320      |          | 380      |         | 370      |          | 390      |  |
| Rainfall (mm)                 |           | 150.4    |           | 72.5     |           | 123.6    |          | 71.9     |         | 115.6    |          | 73.4     |  |
| Total water applied (mm)      |           | 450.4    |           | 412.5    |           | 443.6    |          | 451.9    |         | 485.6    |          | 463.4    |  |

Supplementary Table S5. Irrigation scheduling for wheat during two growing seasons (2016/2017 and 2017/2018) in three soil types non- saline (N-S), saline (S) and highly saline (HS). Number of irrigations in deficit and full regime were four and five respectively. Total water applied calculated by sum of irrigation water applied and total accumulated rainfall through season. Irrigation scheduling (date and quota) was determined for different irrigation regimes (DI and FI) based on the required depletion of soil available water.
